# Supplementary material for: Bimetallic Metal-Organic Framework Derived Nanocatalyst for CO2 Fixation through Benzimidazole Formation and Methanation of CO2
Source: MDPI journal article supplement (doi:10.3390/catal13020357), 2023-02-06
Supplement: s1 [file s1]

## Supporting Information

### Bimetallic Metal-Organic Framework derived nanocatalyst for CO<sub>2</sub> fixation through benzimidazole formation and methanation of CO<sub>2</sub>

Aasif Helal,<sup>a\*</sup> Mohammed Ahmed Sanhoob, Bosirul Hoque, Muhammad Usman, Md. Hassan Zahir<sup>b</sup>

<sup>a</sup>Interdisciplinary Research Center for Hydrogen and Energy Storage, <sup>b</sup>Interdisciplinary Research Center for Renewable Energy and Power Systems, King Fahd University of Petroleum & Minerals, Dhahran 31261, Saudi Arabia

Corresponding authors

Tel: +966 013 860 7532; E-mail address: [aasifh@kfupm.edu.sa](mailto:aasifh@kfupm.edu.sa) (A. Helal)

|                   |                                                                       |          |
|-------------------|-----------------------------------------------------------------------|----------|
| <b>Section S1</b> | <i>Characterization of different ratios of CoNiBTC and CoNi@C</i>     | S2-S6    |
| <b>Section S2</b> | <i><sup>1</sup>H and <sup>13</sup>C NMR of Benzimidazole products</i> | S7       |
| <b>Section S3</b> | <i><sup>1</sup>H NMR spectra of Benzimidazole products</i>            | S8, S9   |
| <b>Section S4</b> | <i>Regeneration of Catalyst after Reaction</i>                        | S10      |
| <b>Section S5</b> | <i>Methanation Reaction</i>                                           | S11, S12 |
| <b>Section S6</b> | <i>References</i>                                                     | S13      |

# Section S1: Characterization of different ratios of CoNiBTC and CoNi@C

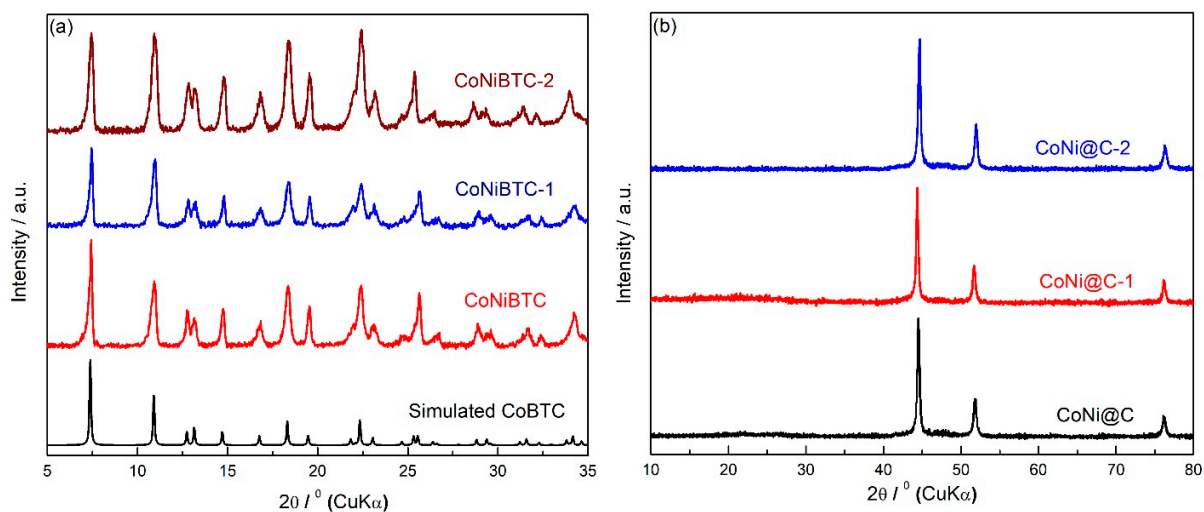

**Figure S1.** Pxd of (a) CoNiBTC, CoNiBTC-1, and CoNiBTC-2; (b) CoNi@C, CoNi@C-1, CoNi@C -2.

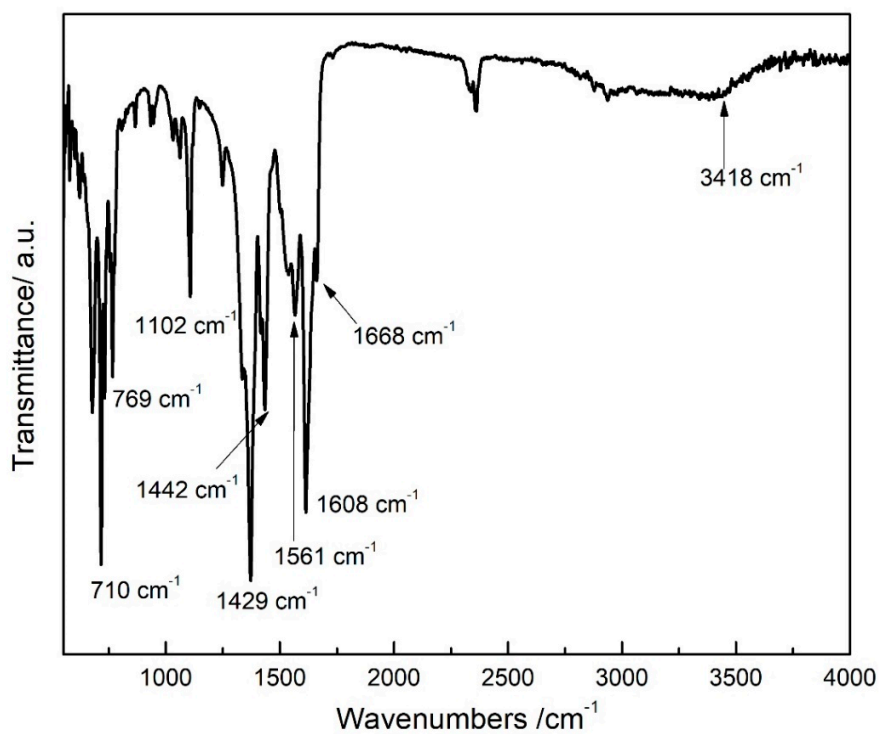

**Figure S2.** The FTIR spectrum of bimetallic CoNiBTC.

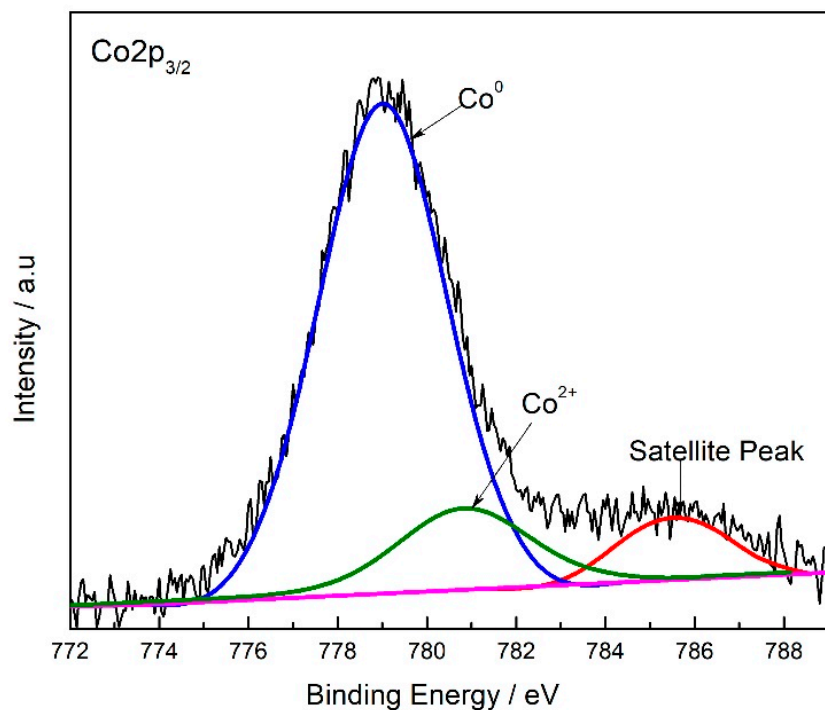

**Figure S3.** Deconvoluted XPS spectrum of  $\text{Co}2p_{3/2}$ .

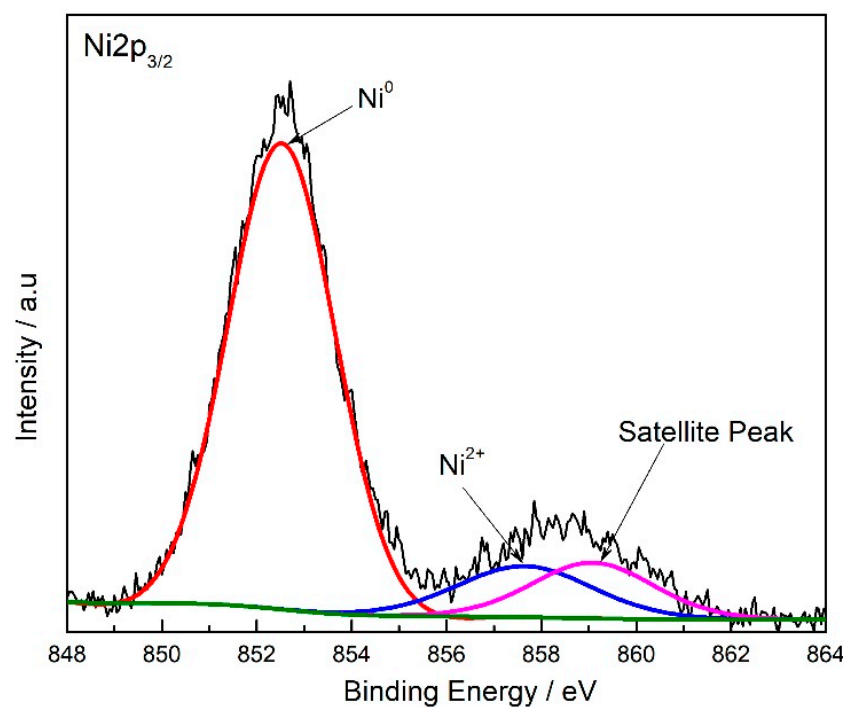

**Figure S4.** Deconvoluted XPS spectrum of  $\text{Ni}2p_{3/2}$ .

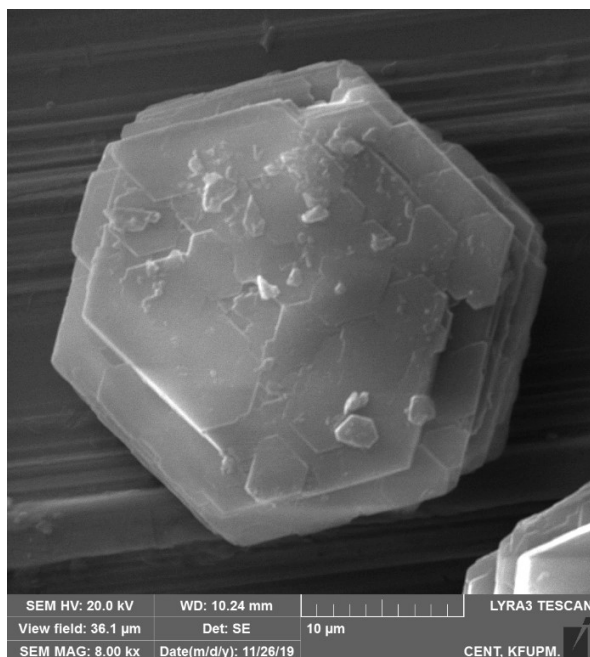

**Figure S5.** FESEM of bimetallic CoNiBTC.

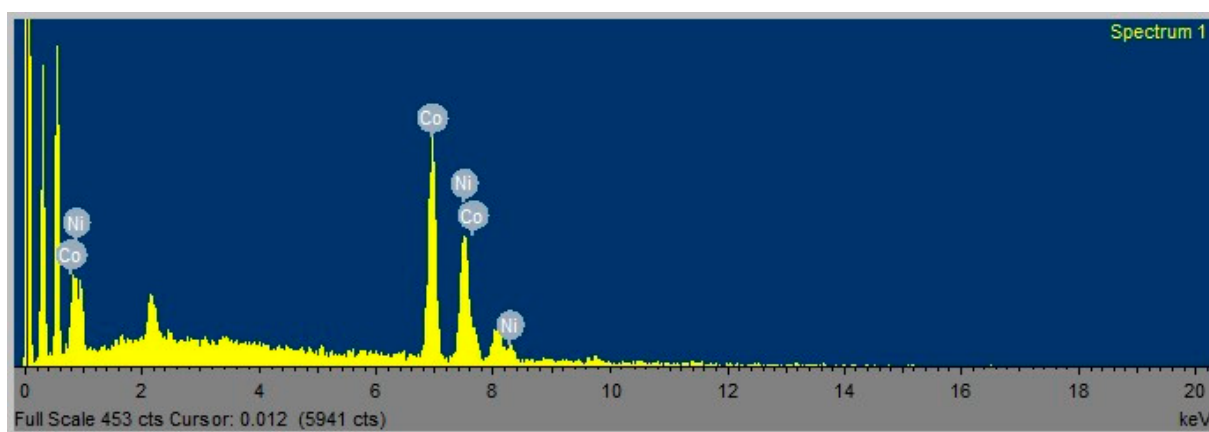

**Figure S6.** EDX analysis of bimetallic CoNiBTC.

**Table S1:** Ratio of the metals in bimetallic CoNiBTC

| Element | Weight% | Atomic% |
|---------|---------|---------|
| Co K    | 61.61   | 61.52   |
| Ni K    | 38.39   | 38.48   |
| Totals  | 100.00  |         |

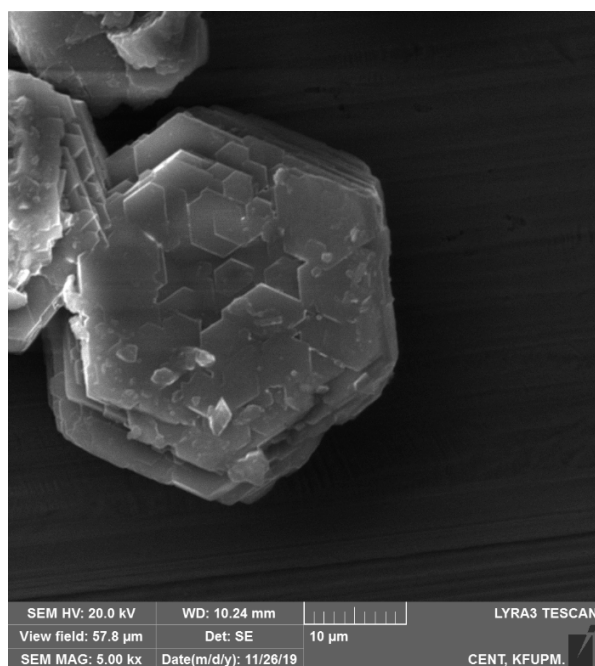

**Figure S7.** FESEM of bimetallic CoNiBTC-1.

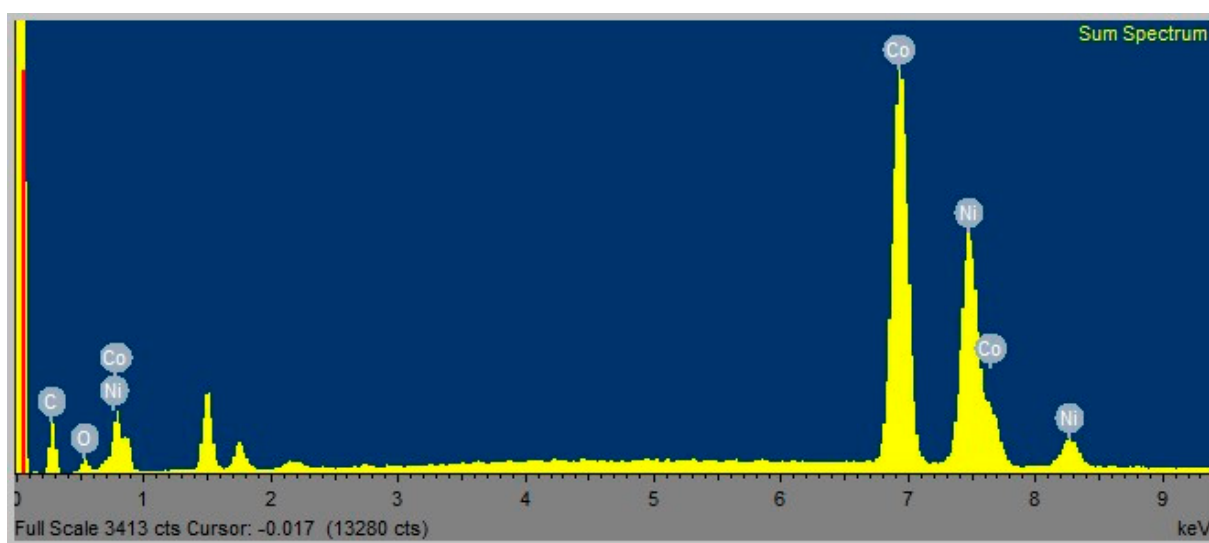

**Figure S8.** EDX analysis of bimetallic CoNiBTC-1.

**Table S2:** Ratio of the metals in bimetallic CoNiBTC-1

| Element | Weight% | Atomic% |
|---------|---------|---------|
| Co K    | 52.18   | 52.23   |
| Ni K    | 47.82   | 47.77   |
| Totals  | 100.00  |         |

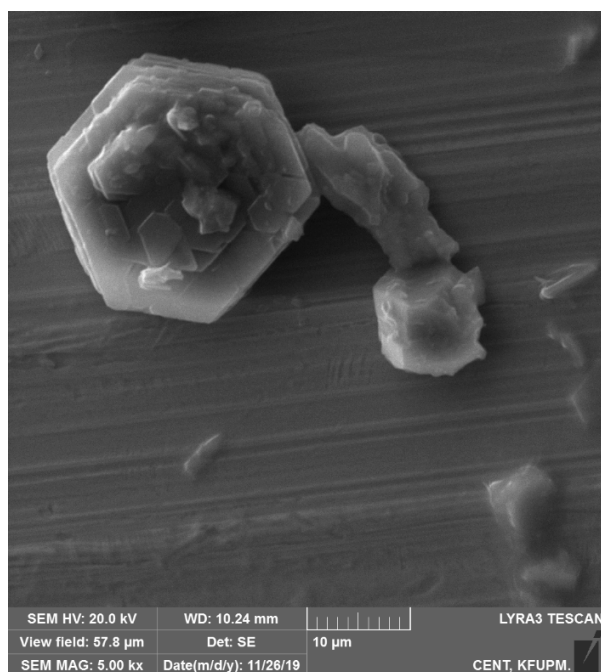

**Figure S9.** FESEM of bimetallic CoNiBTC-2.

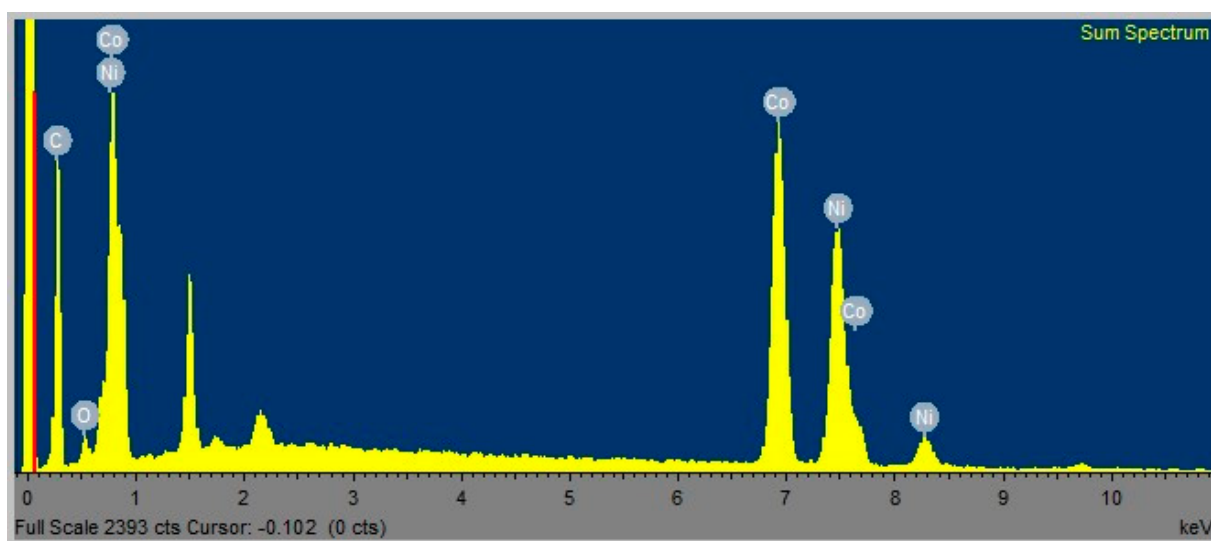

**Figure S10.** EDX analysis of bimetallic CoNiBTC-2.

**Table S3:** Ratio of the metals in bimetallic CoNiBTC-2

| Element | Weight% | Atomic% |
|---------|---------|---------|
| Co K    | 39.47   | 39.36   |
| Ni K    | 60.53   | 60.64   |
| Totals  | 100.00  |         |

## Section S2: $^1\text{H}$ NMR and $^{13}\text{C}$ NMR of the Benzimidazole Products

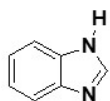

### 1H-benzo[d]imidazole (1)

$^1\text{H}$  NMR (DMSO- $d_6$ , 400 MHz, ppm.):  $\delta$  8.23 (s, 1H), 7.59 (d,  $J$  = 5.6 Hz, 2H), 7.18 (t,  $J$  = 2.8 Hz, 2H);  $^{13}\text{C}$  NMR (DMSO- $d_6$ , 400 MHz, ppm):  $\delta$  141.9, 138.1, 121.7, 115.3.

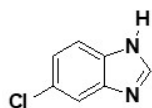

### 5-chloro-1H-benzo[d]imidazole (2)

$^1\text{H}$  NMR (DMSO- $d_6$ , 400 MHz, ppm.):  $\delta$  8.55 (s, 1H), 8.50 (s, 1H), 8.11 (d,  $J$  = 8.8 Hz, 1H), 7.76 (d,  $J$  = 8.8 Hz, 1H);  $^{13}\text{C}$  NMR (DMSO- $d_6$ , 400 MHz, ppm):  $\delta$  146.5, 142.4, 117.3.

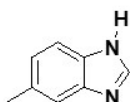

### 5-methyl-1H-benzo[d]imidazole (3)

$^1\text{H}$  NMR (DMSO- $d_6$ , 400 MHz, ppm.):  $\delta$  8.26 (s, 1H), 7.64 (s, 1H), 7.57 (d,  $J$  = 5.6 Hz, 1H), 7.19 (d,  $J$  = 8.4 Hz, 2H), 3.39 (s, 1H);  $^{13}\text{C}$  NMR (DMSO- $d_6$ , 400 MHz, ppm):  $\delta$  142.1, 131.3, 123.6, 115.0, 21.7.

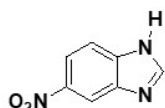

### 5-nitro-1H-benzo[d]imidazole (4)

$^1\text{H}$  NMR (DMSO- $d_6$ , 400 MHz, ppm.):  $\delta$  8.13 (s, 1H), 7.47 (s, 1H), 7.36 (s, 1H), 7.00 (s, 1H);  $^{13}\text{C}$  NMR (DMSO- $d_6$ , 400 MHz, ppm):  $\delta$  143.3, 142.4, 138.7, 118.7, 115.3, 111.9.

### Section S3: $^1\text{H}$ NMR spectra of the Benzimidazole Products

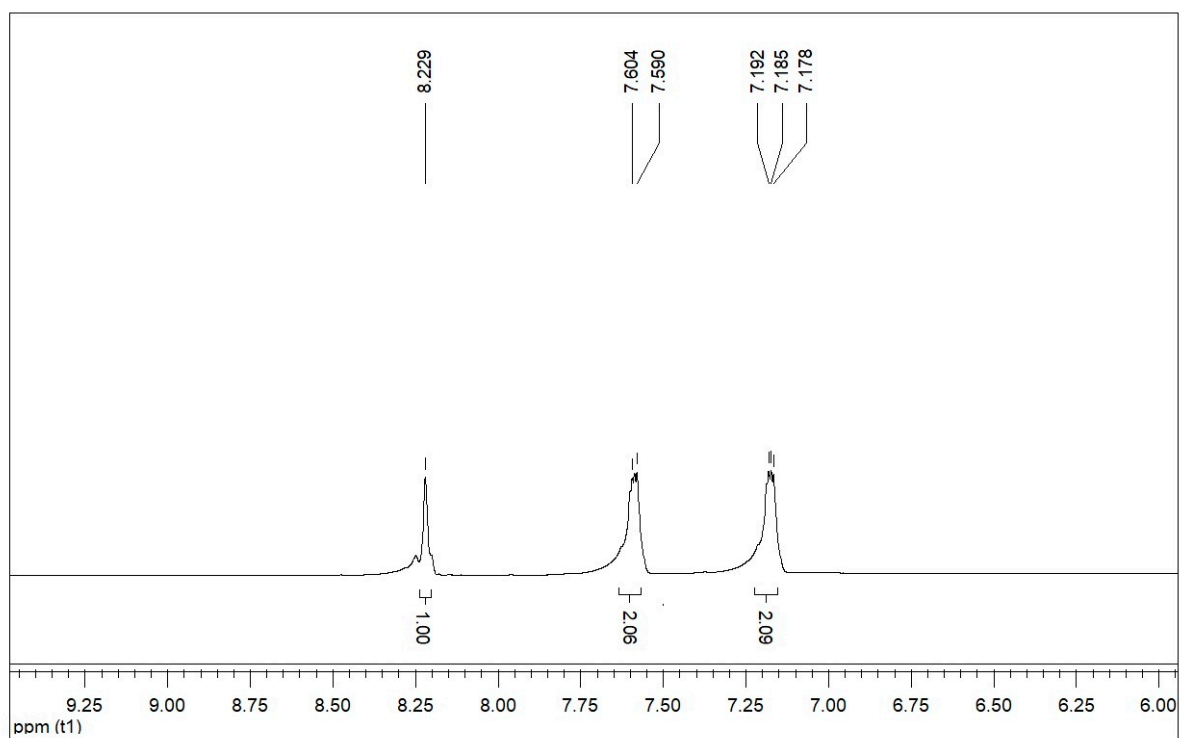

**Figure S11.**  $^1\text{H}$  NMR spectrum of **1**.

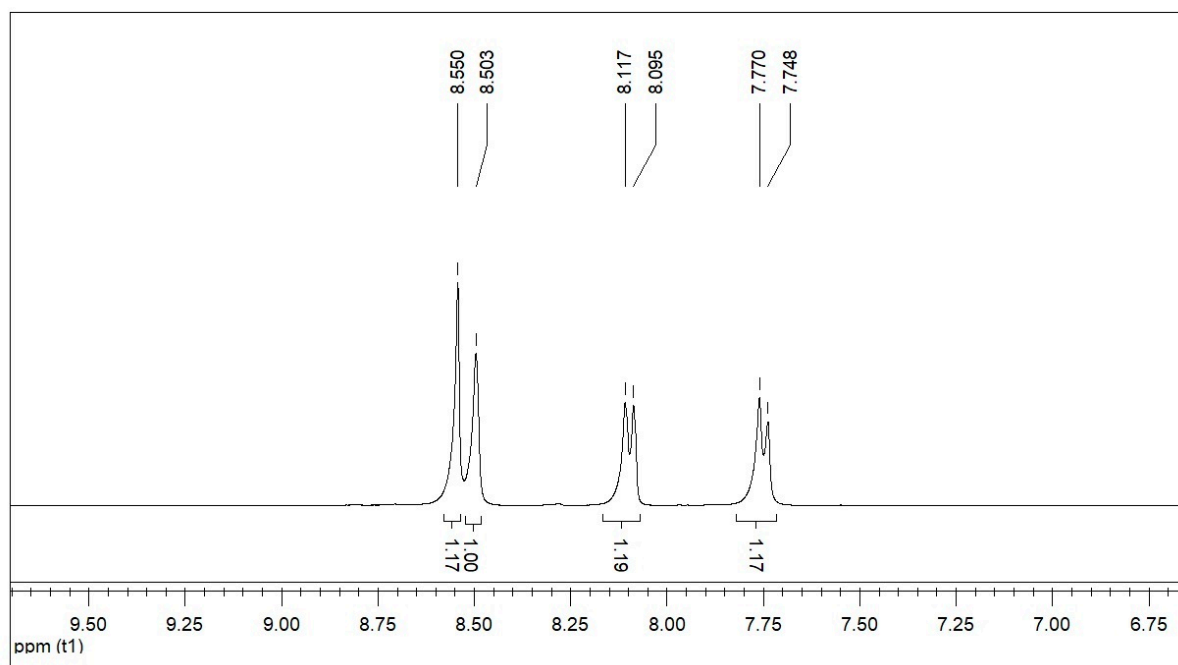

**Figure S12.**  $^1\text{H}$  NMR spectrum of **2**.



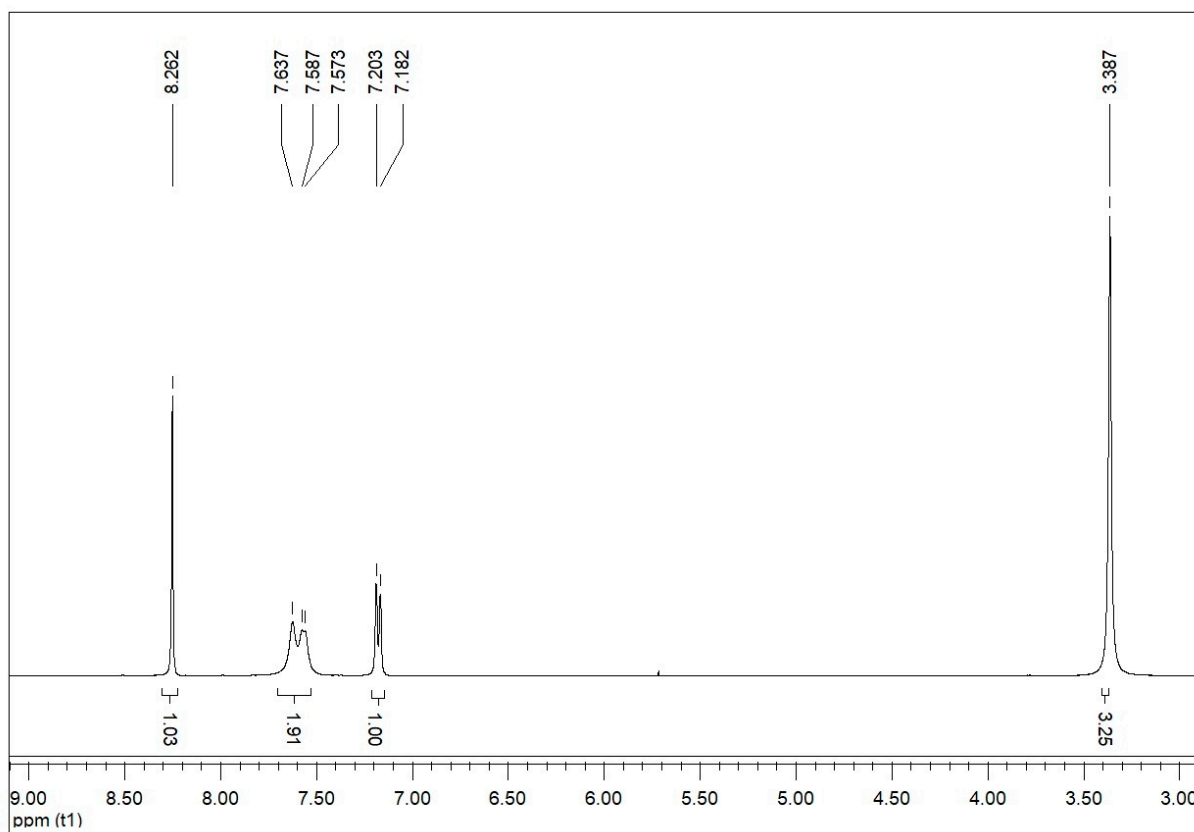

**Figure S13.** <sup>1</sup>H NMR spectrum of **3**.

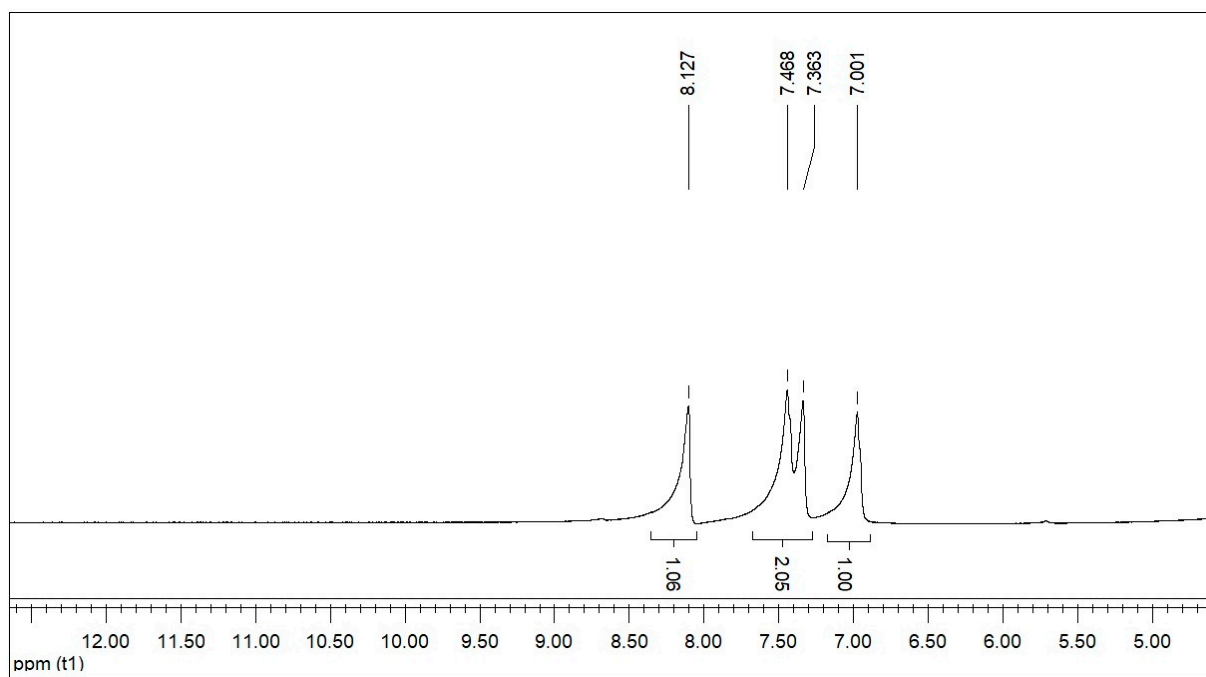

**Figure S14.** <sup>1</sup>H NMR spectrum of **4**.

#### Section S4: Regeneration of Catalyst after Reaction

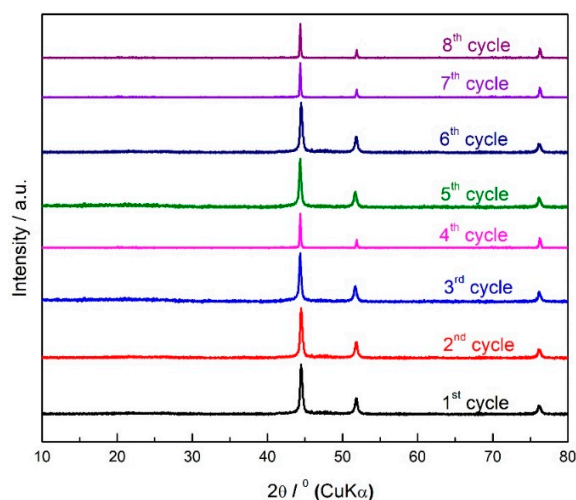

**Figure S15.** Powdered XRD of the catalyst CoNi@C after each cycle of catalysis.

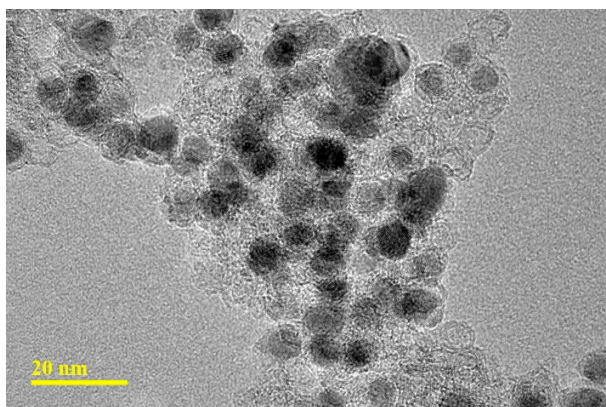

**Figure S16.** TEM of the catalyst CoNi@C 8 cycles of catalysis.

Table S4

| S.N | Catalysts                                         | Condition (temperature/pressure/time)               | Yield (%) | Ref.      |
|-----|---------------------------------------------------|-----------------------------------------------------|-----------|-----------|
| 1.  | CH <sub>3</sub> COOK, Phenylsilane                | 40°C/1 bar CO <sub>2</sub> /24 h                    | 90        | 37        |
| 2.  | Cu-NPs@COF <sup>a</sup>                           | 60°C/1 bar CO <sub>2</sub> /12 h                    | 95        | 19        |
| 3.  | RuCl <sub>2</sub> (dppe) <sub>2</sub>             | 120°C/150 bar CO <sub>2</sub> +H <sub>2</sub> /40 h | 92        | 23        |
| 4.  | Au/TiO <sub>2</sub>                               | 100°C/80 bar CO <sub>2</sub> +H <sub>2</sub> /12 h  | 95        | 38        |
| 5.  | [PS-Zn(II)-SALTETA, <sup>a</sup>                  | 100°C/1 bar CO <sub>2</sub> /24 h                   | 93        | 39        |
| 6.  | CoF <sub>2</sub> , Ph <sub>3</sub> P, CsF         | 140°C/60 bar CO <sub>2</sub> +H <sub>2</sub> /24 h  | 94        | 40        |
| 7.  | Cu@U-g-C <sub>3</sub> N <sub>4</sub> <sup>a</sup> | 100°C/25 bar CO <sub>2</sub> /24 h                  | 92        | 41        |
| 8.  | CuFe <sub>2</sub> O <sub>4</sub>                  | 180°C/1 bar CO <sub>2</sub> /12 h                   | 96        | 42        |
| 9.  | CoNi@C                                            | 115°C/30 bar CO <sub>2</sub> +H <sub>2</sub> /18 h  | 81        | This work |

<sup>a</sup>DMAB- dimethylamine borane

## Section S5: Methanation Reaction

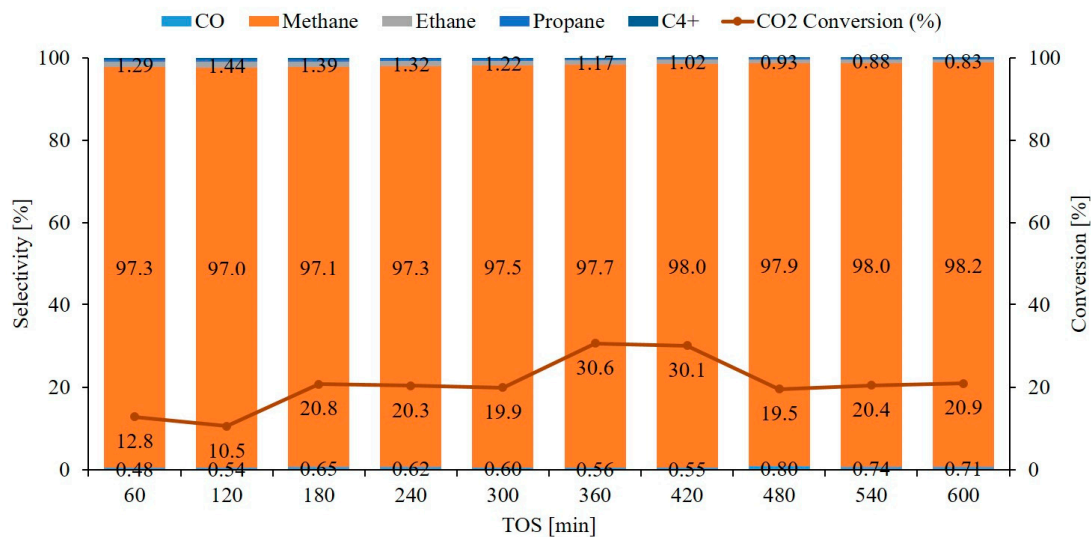

**Figure S17.** CoNi@C 0.2g, Flow of Mixture=15 ml, mixture (H<sub>2</sub>: CO<sub>2</sub>) =3:1, T=375°C, 10 bar

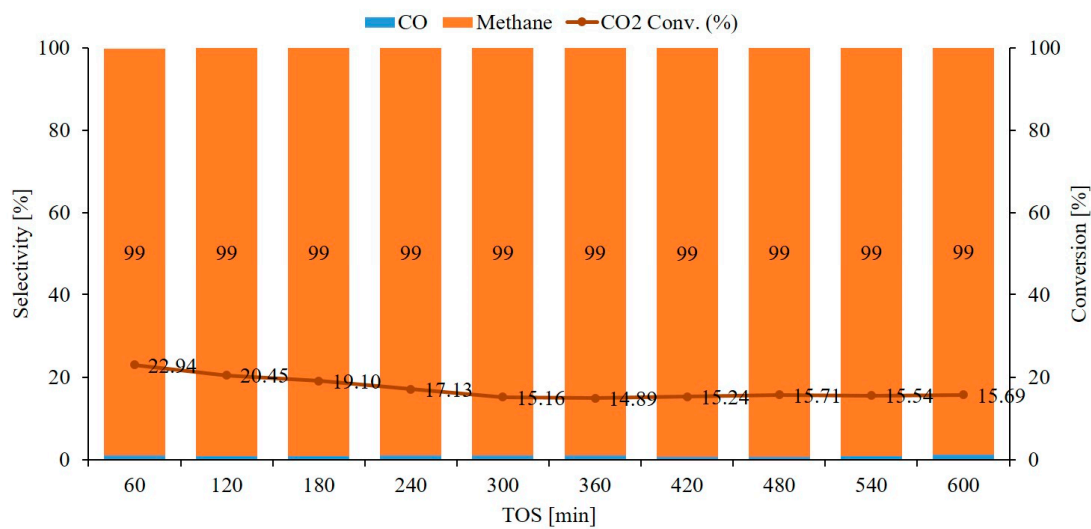

**Figure S18.** CoNi@C-1 0.2g, Flow of Mixture=15 ml, mixture (H<sub>2</sub>: CO<sub>2</sub>) =3:1, T=375°C, 10 bar

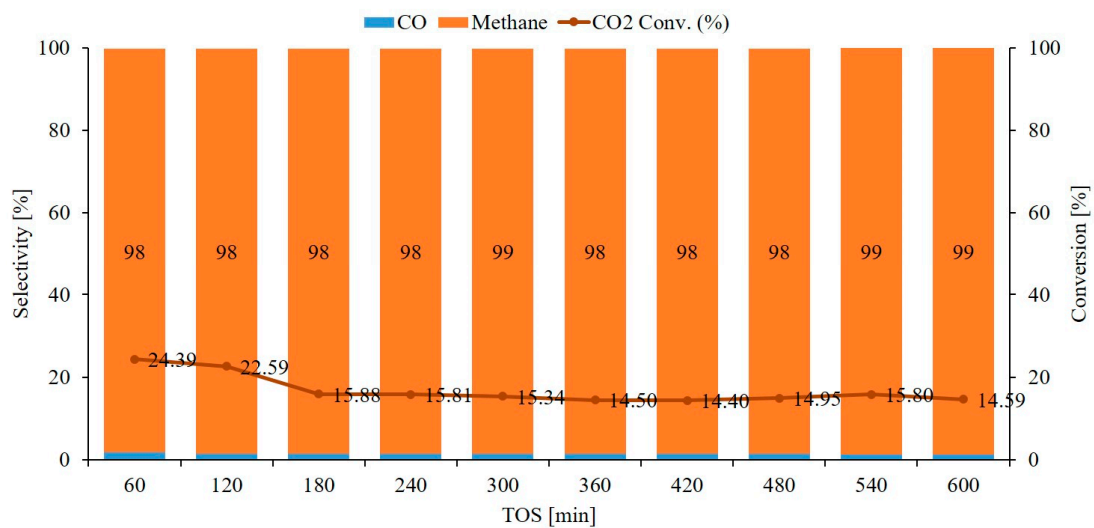

**Figure S19.** CoNi@C-2 0.2g, Flow of Mixture=15 ml, mixture (H<sub>2</sub>: CO<sub>2</sub>) =3:1, T=375°C, 10 bar

Table S5

| S.N | Catalysts                                          | Condition (temperature/pressure) | Selectivity (%) | Ref.      |
|-----|----------------------------------------------------|----------------------------------|-----------------|-----------|
| 1.  | Ni@C                                               | 350 °C                           | 98              | 29        |
| 2.  | Ni/SiO <sub>2</sub>                                | 250 °C/1 bar                     | 98              | 43        |
| 3.  | Co/SiO <sub>2</sub>                                | 360 °C/1 bar                     | 86.5            | 44        |
| 4.  | Co/KIT-6                                           | 360 °C                           | 94.5            | 45        |
| 5.  | NiWP                                               | 327 °C                           | 80              | 46        |
| 6.  | Ni/CeO <sub>2</sub> -NR                            | 300 °C                           | 99              | 47        |
| 7   | CoMn <sub>x</sub> Al <sub>2-x</sub> O <sub>4</sub> | 400 °C                           | 97              | 48        |
| 8   | Ru-TiO <sub>x</sub>                                | 259.3 °C                         | 99.9            | 49        |
| 9.  | CoNi@C                                             | 375°C/30 bar                     | 99.8            | This work |
